# Supplementary material for: Interfacial construction of P25/Bi2WO6 composites for selective CO2 photoreduction to CO in gas–solid reactions
Source: Royal Society of Chemistry journal article supplement (doi:10.1039/d3ra00418j), 2023-01-01
Supplement: d3ra00418j1.pdf [file d3ra00418j1.pdf]

Supplementary material for

## Interfacial construction of P25/Bi<sub>2</sub>WO<sub>6</sub> composites for selective CO<sub>2</sub> photoreduction to CO in Gas-Solid reaction

### 3. Results and discussion

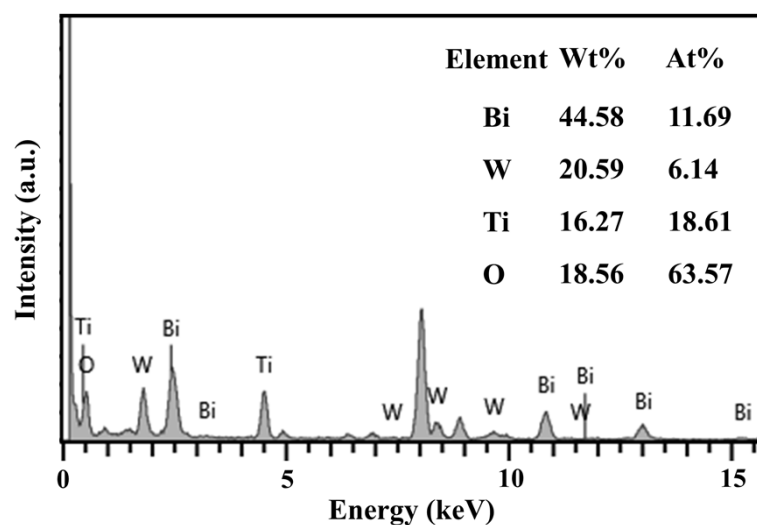

Fig. S1. EDS spectra of P25/BWO-20 heterojunction.

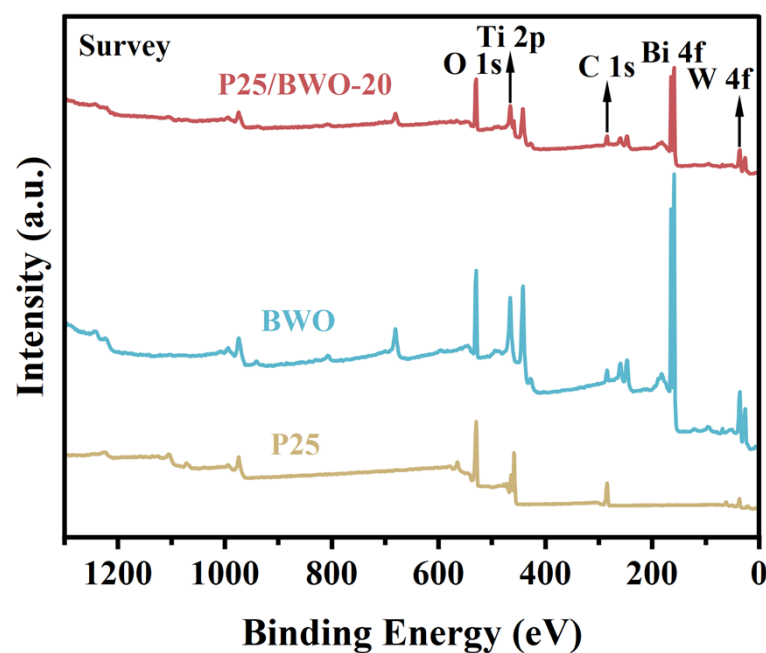

Fig. S2. XPS survey spectra of P25, BWO and P25/BWO-20 heterojunction.

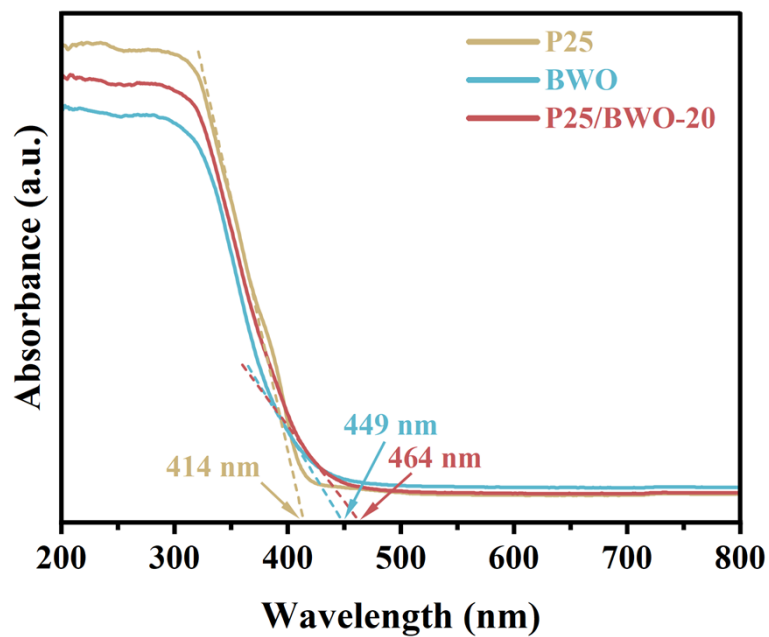

Fig. S3. UV-vis DRS of the as-prepared samples.

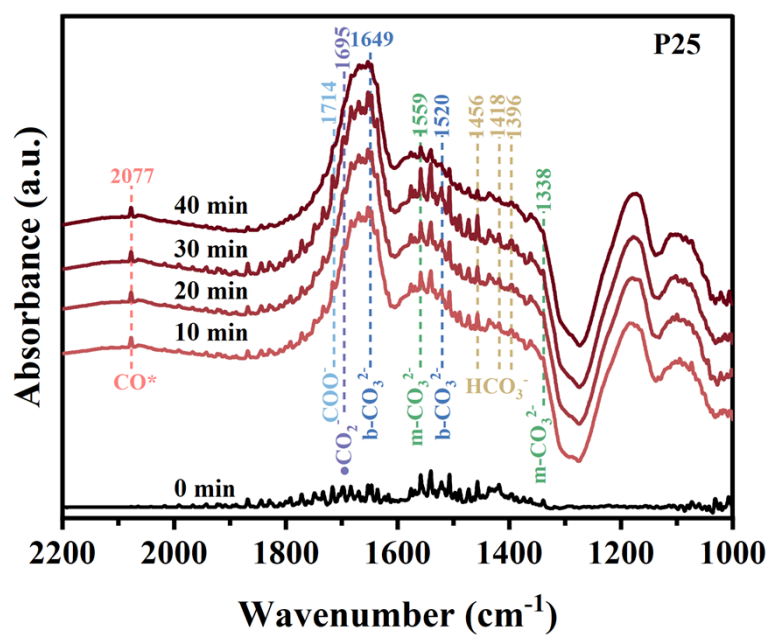

Fig. S4. In-situ DRIFTS spectra of surface adsorbed  $\text{CO}_2$  species and photocatalytic  $\text{CO}_2$  reduction intermediates of P25.
